# Supplementary material for: Influence of ultra-micropore volume of activated carbons prepared from noble mung bean on the adsorption properties of CO2, CH4, and N2
Source: Royal Society of Chemistry journal article supplement (doi:10.1039/d2nj02600g), 2022-01-01
Supplement: d2nj02600g1.pdf [file d2nj02600g1.pdf]

# **Influence of Ultra-micropore Volume of Activated Carbons Prepared from Noble Mung Bean on the Adsorption Properties of CO<sub>2</sub>, CH<sub>4</sub>, and N<sub>2</sub>**

Kyung-Jun Hwang<sup>a,†</sup>, M.S. Balathanimigami<sup>b,†</sup>, Young Hyeon Choi<sup>c</sup>,

Soon-Do Yoon<sup>d,\*</sup>, and Wang-Geun Shim<sup>e,\*</sup>

*<sup>a</sup>Gangwon Regional Agency for Science & Technology,*

*Gangneung Science & Industry Promotion Agency, Gangneung-si, Gangwon-do 25440,*

*Republic of Korea*

*<sup>b</sup> Department of Chemical Engineering and Biochemical Engineering,*

*Rajiv Gandhi Institute of Petroleum Technology, Jais 229 304, India*

*<sup>c</sup>Department of Material Engineering, Gangneung-Wonju National University,*

*Gangneung-si, Gangwon-do 25457, Republic of Korea*

*<sup>d</sup>Department of Chemical and Biomolecular Engineering, Chonnam National University,*

*Yeosu-si, Jeollanam-do 59626, Republic of Korea*

*<sup>e</sup>Department of Chemical Engineering, Suncheon National University,*

*255 Jungang-Ro, Suncheon-si, Jeollanam-do 57922, Republic of Korea*

*\*Corresponding Author: Prof. S.-D. Yoon, Prof. W.-G. Shim,*

*E-mail: sdyun03@jnu.ac.kr, wgshim@suncheon.ac.kr*

Figure S1 shows the thermal decomposition curve of mung bean powder used as a raw material for activated carbon with ultra-micropore volume by TGA analysis. It can be seen that three different weight loss stages were observed in the thermal decomposition of mung bean powder under a nitrogen atmosphere. That is, the first stage represents a loss of trapped water molecules (3.20% of the weight loss at 130 °C), while the second stage occurs in the temperature range of about 200-400 °C, resulting in a rapid 82.94% weight loss. This second stage is the main decomposition stage, which is completed at about 400 °C. In this step, the major components such as carbohydrate and protein degradation of mung bean powder occur. In the last stage, the carbonization of mung bean powder occurred between 400 °C and 950 °C. The pyrolysis temperature provides important information in determining the carbonization conditions for producing adsorbents in this study.

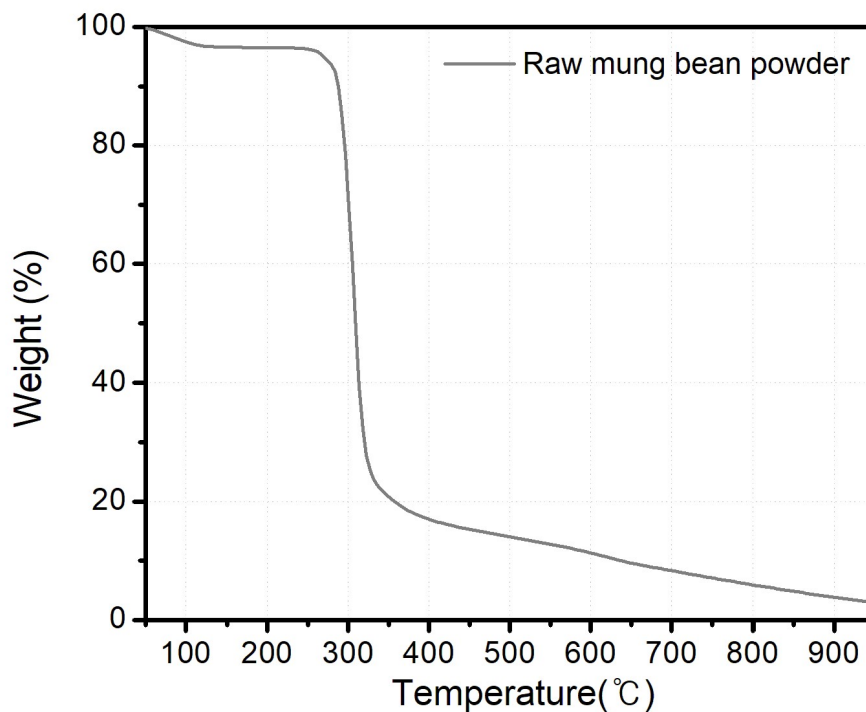

**Figure S1** TGA curves for the raw mung bean powders under N<sub>2</sub> gas condition.

**Table S1** Surface composition of C-400 and MACs measured by XPS

| Sample  | Atomic content (%) |      |      |
|---------|--------------------|------|------|
|         | C                  | O    | N    |
| C-400   | 93.4               | 6.2  | 0.41 |
| 1:4-800 | 91.4               | 8.0  | 0.53 |
| 1:4-900 | 88.2               | 11.0 | 0.81 |
| 1:1-800 | 91.9               | 7.6  | 0.49 |

**Table S2** Functional groups obtained from the deconvolution of the C<sub>1s</sub> peak for C-400 and MACs

| Sample  | Graphite<br>[at.(%)] | Phenol<br>[at.(%)] | Carbonyl<br>[at.(%)] | Carboxyl<br>[at.(%)] |
|---------|----------------------|--------------------|----------------------|----------------------|
| C-400   | 66.3                 | 25.8               | 6.8                  | 1.2                  |
| 1:4-800 | 46.3                 | 36.5               | 10.6                 | 6.6                  |
| 1:4-900 | 46.1                 | 37.4               | 13.5                 | 3.0                  |
| 1:1-800 | 50.0                 | 34.6               | 13.0                 | 2.4                  |
